## Lysosome-targeting agents in cancer therapy

Guido Kroemer<sup>1,2,3,4,5,6,7</sup> and Lorenzo Galluzzi<sup>1,8,9</sup>

<sup>1</sup> Université Paris Descartes/Paris V, Paris, France

<sup>2</sup> Université Pierre et Marie Curie/Paris VI, Paris, France

<sup>3</sup> Equipe 11 labellisée Ligue contre le Cancer, Centre de Recherche des Cordeliers, Paris, France

<sup>4</sup> INSERM, U1138, Paris, France

<sup>5</sup> Metabolomics and Cell Biology Platforms, Gustave Roussy Comprehensive Cancer Institute, Villejuif, France

<sup>6</sup> Department of Women's and Children's Health, Karolinska Institute, Karolinska University Hospital, Stockholm, Sweden

<sup>7</sup> Pôle de Biologie, Hôpital Européen George Pompidou, AP-HP, Paris, France

<sup>8</sup> Department of Radiation Oncology, Weill Cornell Medical College, New York, NY, USA

<sup>9</sup> Sandra and Edward Meyer Cancer Center, New York, NY, USA

**Correspondence to:** Guido Kroemer, **email:** kroemer@orange.fr

Lorenzo Galluzzi, **email:** deadoc@vodafone.it

**Keywords:** anticancer immunosurveillance, autophagy, chemotherapy, chloroquine, hydroxychloroquine

**Received:** August 31, 2017

**Accepted:** September 16, 2017

**Published:** October 03, 2017

**Copyright:** Kroemer et al. This is an open-access article distributed under the terms of the Creative Commons Attribution License 3.0 (CC BY 3.0), which permits unrestricted use, distribution, and reproduction in any medium, provided the original author and source are credited.

### ABSTRACT

**Despite considerable efforts from multiple laboratories worldwide, highly specific inhibitors of autophagy for clinical use are not yet available. Lysosomal inhibitors are being employed instead, in spite of multiple limitations that are summarized herein.**

Levy and colleagues have recently provided a comprehensive and balanced overview on the therapeutic potential of autophagy-targeting agents for cancer therapy [1]. Indeed, owing to its privileged position at the hub of multiple, if not all, cellular processes [2], autophagy stands out as a promising target for the development of new therapeutic regimens against a large panel of human disorders [3]. Unfortunately, truly specific pharmacological inhibitors of autophagy are not yet available for use in cancer patients [3].

Chloroquine and hydroxychloroquine have been extensively tested as antineoplastic agents in preclinical and clinical settings with promising results [4, 5], but these antimalarial drugs operate by inhibiting lysosomal acidification, which affects autophagy as well as all forms of vesicular trafficking [6]. In line with this notion, chloroquine and hydroxychloroquine have been shown to inhibit the growth of malignant cells *in vitro* and *in vivo* by autophagy-independent mechanisms [7-9].

Another potential issue with using chloroquine and hydroxychloroquine for oncological indications is linked to their immunosuppressive effects [10]. Indeed, it is now widely accepted that the elicitation of antitumor immunity is key to long-term therapeutic efficacy in patients affected by most, if not all, malignancies [11]. In this setting, the

systemic administration of lysosomal inhibitors such as chloroquine and hydroxychloroquine might therefore be detrimental as it would favor the escape of malignant cells from immunosurveillance [12]. Accordingly, the administration of chloroquine to 39 patients with brain metastases from solid tumors receiving whole-brain irradiation (WBI) improved locoregional disease control (as compared to 39 patients who received WBI only), but failed to ameliorate response rate and overall survival [13]. Thus, at least in some settings, combining standard-of-care therapeutic regimens with lysosomal inhibitors may confer short-term benefits that are not paralleled by an actual extension in patient survival. Finally, although results from multiple clinical trials indicate that these agents are well tolerated by patients with a variety of neoplasm [5], experience from other fields of investigation suggests that the toxicities of chloroquine and hydroxychloroquine must be taken into attentive consideration [10].

The development of truly specific pharmacological inhibitors of autophagy for clinical use will shed additional light on the actual therapeutic potential of this approach for the management of neoplastic conditions. We surmise that refined targeted strategies will have to be conceived to focus the therapeutic effects of autophagy inhibitors on cancer cells as anticancer immune responses (which also

rely on autophagy) remain fully operational.

## ACKNOWLEDGMENTS

LG is supported by an intramural startup from the Department of Radiation Oncology of Weill Cornell Medical College (New York, US), and by Sotio a.c. (Prague, Czech Republic). GK is supported by the French Ligue contre le Cancer (équipe labellisée); Agence National de la Recherche (ANR) – Projets blancs; ANR under the frame of E-Rare-2, the ERA-Net for Research on Rare Diseases; Association pour la recherche sur le cancer (ARC); Cancéropôle Ile-de-France; Institut National du Cancer (INCa); Institut Universitaire de France; Fondation pour la Recherche Médicale (FRM); the European Commission (ArtForce); the European Research Council (ERC); the LeDucq Foundation; the LabEx Immunology; the SIRIC Stratified Oncology Cell DNA Repair and Tumor Immune Elimination (SOCRATE); the SIRIC Cancer Research and Personalized Medicine (CARPEM); and the Paris Alliance of Cancer Research Institutes (PACRI).

## CONFLICTS OF INTEREST

There is no conflict of interest.

## REFERENCES

1. Levy JM, Towers CG, Thorburn A. Targeting autophagy in cancer. *Nat Rev Cancer*. 2017; 17:528–42.
2. Galluzzi L, Baehrecke EH, Ballabio A, Boya P, Bravo-San Pedro JM, Cecconi F, Choi AM, Chu CT, Codogno P, Colombo MI, Cuervo AM, Debnath J, Deretic V, et al. Molecular definitions of autophagy and related processes. *EMBO J*. 2017; 36:1811–36.
3. Galluzzi L, Bravo-San Pedro JM, Levine B, Green DR, Kroemer G. Pharmacological modulation of autophagy: therapeutic potential and persisting obstacles. *Nat Rev Drug Discov*. 2017; 16:487–511.
4. Fulda S. Autophagy in Cancer Therapy. *Front Oncol*. 2017; 7:128.
5. Galluzzi L, Bravo-San Pedro JM, Demaria S, Formenti SC, Kroemer G. Activating autophagy to potentiate immunogenic chemotherapy and radiation therapy. *Nat Rev Clin Oncol*. 2017; 14:247–58.
6. Xu H, Ren D. Lysosomal physiology. *Annu Rev Physiol*. 2015; 77:57–80.
7. Eng CH, Wang Z, Tkach D, Toral-Barza L, Ugwonali S, Liu S, Fitzgerald SL, George E, Frias E, Cochran N, De Jesus R, McAllister G, Hoffman GR, et al. Macroautophagy is dispensable for growth of KRAS mutant tumors and chloroquine efficacy. *Proc Natl Acad Sci USA*. 2016; 113:182–87.
8. Maes H, Kuchnio A, Peric A, Moens S, Nys K, De Bock K, Quaegebeur A, Schoors S, Georgiadou M, Wouters J, Vinckier S, Vankelecom H, Garmyn M, et al. Tumor vessel normalization by chloroquine independent of autophagy. *Cancer Cell*. 2014; 26:190–206.
9. Maycotte P, Aryal S, Cummings CT, Thorburn J, Morgan MJ, Thorburn A. Chloroquine sensitizes breast cancer cells to chemotherapy independent of autophagy. *Autophagy*. 2012; 8:200–12.
10. Taherian E, Rao A, Malemud CJ, Askari AD. The biological and clinical activity of anti-malarial drugs in autoimmune disorders. *Curr Rheumatol Rev*. 2013; 9:45–62.
11. Fridman WH, Zitvogel L, Sautès-Fridman C, Kroemer G. The immune contexture in cancer prognosis and treatment. *Nat Rev Clin Oncol*. 2017. <https://doi.org/10.1038/nrclinonc.2017.101>.
12. Kroemer G, Senovilla L, Galluzzi L, André F, Zitvogel L. Natural and therapy-induced immunosurveillance in breast cancer. *Nat Med*. 2015; 21:1128–38.
13. Rojas-Puentes LL, Gonzalez-Pinedo M, Crismatt A, Ortega-Gomez A, Gamboa-Vignolle C, Nuñez-Gomez R, Dorantes-Gallareta Y, Arce-Salinas C, Arrieta O. Phase II randomized, double-blind, placebo-controlled study of whole-brain irradiation with concomitant chloroquine for brain metastases. *Radiat Oncol*. 2013; 8:209. .
